# Supplementary material for: Wide bite angle amine, arsine and phosphine ligands in rhodium- and platinum/tin-catalysed hydroformylation †
Source: Royal Society of Chemistry journal article supplement (doi:10.1039/b002126l), 2000-01-01
Supplement: b002126l.doc [file b002126l.doc]

Wide Bite Angle Amine-, Arsine, and Phosphine Ligands in Rhodium-, and Platinum/tin-catalysed Hydroformylation.†

Lars A. van der Veen, Peter K. Keeven, Paul C. J. Kamer, Piet W. N. M. van Leeuwen*

*Contribution from the Institute of Molecular Chemistry, University of Amsterdam, Nieuwe Achtergracht 166, 1018 WV Amsterdam, The Netherlands*

*E-mail: pwnm@anorg.chem.uva.nl*

Supplementary information

**General Procedures.** All reactions were carried out using standard Schlenk techniques under an atmosphere of purified argon. Toluene and *o*-dichlorobenzene were distilled from sodium, THF from sodium/benzophenone, and hexanes from sodium/benzophenone/triglym. Methanol, ethanol, and dichloromethane were distilled from CaH2. Chemicals were purchased from Acros Chimica and Aldrich Chemical Co. Chlorodiphenylarsine44 and 10-Chlorophenoxarsine45 were prepared according to literature procedures. Melting points were determined on a Gallenkamp MFB-595 melting point apparatus in open capillaries and are uncorrected. NMR spectra were obtained on a Bruker AMX 300 spectrometer. 31P and 13C spectra were measured 1H decoupled. TMS was used as a standard for 1H and 13C NMR and H3PO4 for 31P NMR. Elemental analyses were carried out on an Elementar Vario EL apparatus. Infrared spectra were recorded on a Nicolet 510 FT-IR spectrophotometer. HP-IR spectra were measured using a 20-ml home-made stainless steel autoclave equipped with mechanical stirring and ZnS windows. Hydroformylation reactions were carried out in a 200-ml home-made stainless steel autoclave. Syn gas (CO/H2, 1:1, 99.9%) and CO (99.9%) were purchased from Air Liquide. Gas chromatographic analyses were run on an Interscience HR GC Mega 2 apparatus (split/splitless injector, J&W Scientific, DB1 30m column, film thickness 3.0 mm, carrier gas 70 kPa He, FID detector) equipped with a Hewlett-Packard Data system (Chrom-Card).

**2,7-Di-*tert*-butyl-9,9-dimethyl-4,5-diiodoxanthene (5).** At -20 °C 9.2 ml of *n*-butyllithium (2.5 M in hexanes, 23 mmol) was added dropwise to a stirred solution of 5.00 g of 4,5-dibromo-2,7-di-*t*-butyl-9,9-dimethylxanthene (**4**, 10.4 mmol) in 100 ml of THF. The resulting beige suspension was stirred for 2 h. Next a solution of 7.3 g of diiodoethane (26 mmol) in 25 ml of THF was added and the reaction mixture was slowly warmed to room temperature overnight. The reaction mixture was poured out in a saturated sodium thiosulfate solution and extracted with dichloromethane. The organic layer was washed with brine and dried over MgSO4. The solvents were removed in vacuo and the residual off-white powder crystallised from dichloromethane. Yield: 4.90 g of flaky crystals (84%). Mp 281-284 °C. 1H NMR (CDCl3):  = 7.71 (d, 4*J*(H,H) = 2.3 Hz, 2H; H3,6), 7.37 (d, 4*J*(H,H) = 2.3 Hz, 2H; H1,8), 1.62 (s, 6H; CH3), 1.32 (s, 18H; *t*-butyl). 13C{1H} NMR (CDCl3):  = 148.4 (CO), 148.2 (C2,7), 135.0 (C3,6), 130.8 (CC9), 123.0 (C1,8), 84.4 (CI), 35.9 (C9), 34.7 (C(CH3)3), 32.2 (C9CH3), 31.7 (C(CH3)3). IR (KBr, cm-1): 2964 (m), 2952 (m), 2902 (m), 2866 (m), 1457 (m), 1442 (s), 1364 (m), 1274 (s), 875 (m), 738 (m).

**2,7-Di-*tert*-butyl-9,9-dimethyl-4,5-bis(10-phenoxazino)xanthene (2b).** This compound was prepared similarly to **1b**. Compound **2b** was crystallised from THF. Yield: 0.94 g of purple crystals that tarnished under vacuo (52%). Mp 341-342 °C. 1H NMR (CDCl3):  = 7.50 (d, 4*J*(H,H) = 2.4 Hz, 2H; H1,8), 7.14 (d, 4*J*(H,H) = 2.3 Hz, 2H; H3,6), 6.45 (d, 3*J*(H,H) = 7.7 Hz, 4H; CH), 6.34 (bs, 4H; CH), 6.20 (t, 3*J*(H,H) = 7.7 Hz, 4H; CH), 6.59 (d, 3*J*(H,H) = 7.4 Hz, 4H; CH), 1.77 (s, 6H; CH3), 1.32 (s, 18H; *t*-butyl). 13C{1H} NMR (CDCl3):  = 147.1 (CO), 144.8 (CO), 143.6 (C4,5), 133.0 (C2,7), 130.7 (CN), 127.0 (C1,8), 124.6 (CC9), 122.6 (CH), 122.3 (CH), 120.6 (C3,6), 115.1 (CH), 112.2 (CH), 34.7 (C9), 34.5 (C(CH3)3), 33.0 (C9CH3), 31.2 (C(CH3)3). IR (KBr, cm-1): 2963 (s), 2906 (m), 2868 (m), 1595 (m), 1458 (s0, 1423 (m), 1365 (m), 1340 (s), 1294 (m), 1274 (s), 1257 (m), 732 (m), 723 (s). Anal. Calcd. for C47H44N2O3: C, 82.42; H, 6.48; N, 4.09. Found: C, 82.12; H, 6.32; N, 3.96.

**2,7-Di-*tert*-butyl-4-iodo-9,9-dimethyl-5-diphenylaminoxanthene (6).** This compound was prepared similarly to **1b**, with the only difference that in this reaction a 50% excess of compound **5** was used. Compound **6** was crystallised from ethanol/THF. Yield: 1.47 g of white crystals (58%). Mp 161-162 °C. 1H (CDCl3):  = 7.58 (d, 4*J*(H,H) = 2.3 Hz, 1H; CH), 7.37 (d, 4*J*(H,H) = 2.3 Hz, 1H; CH), 7.31 (d, 4*J*(H,H) = 2.3 Hz, 1H; CH), 7.21 (t, 3*J*(H,H) = 7.2 Hz, 4H; CH), 7.12 (m, 5H; CH), 6.94 (t, 3*J*(H,H) = 7.2, 2H; CH), 1.65 (s, 6H; CH3), 1.30 (s, 9H; *t*-butyl), 1.28 (s, 9H; *t*-butyl). 13C{1H} NMR (CDCl3):  = 147.8, 147.6, 147.5, 145.4, 134.9 (CH), 133.3, 131.1, 130.6, 128.9 (CH), 126.3 (CH), 122.8 (CH), 122.0 (CH), 121.5 (CH), 120.0 (CH), 35.6 (C9), 34.7 (C(CH3)3), 34.5 (C(CH3)3), 32.2 (C9CH3), 31.6 (C(CH3)3). IR (KBr, cm-1): 2962 (s), 1591 (s), 1494 (s), 1443 (s), 1364 (m), 1295 (s), 1274 (s), 1243 (s), 875 (m), 742 (s), 691 (s). Anal. Calcd. for C35H38INO: C, 68.29; H, 6.22; N, 2.28. Found: C, 68.35; H, 6.31; N, 2.14.

**2,7-Di-*tert*-butyl-9,9-dimethyl-4-diphenylamino-5-diphenylphosphinoxanthene (1d).** At -60 °C 0.90 ml of *n*-butyllithium (2.5 M in hexanes, 2.2 mmol) was added dropwise to a stirred solution of 1.25 g of **6** (2.56 mmol) in 25 ml of THF. The resulting yellow solution was stirred for 1 h. Next a solution of 0.40 ml of chlorodiphenylphosphine (2.2 mmol) in 5 ml of hexanes was added and the reaction mixture was slowly warmed to room temperature overnight. The reaction mixture was diluted with 25 ml of ethyl acetate and hydrolysed with 25 ml of a one to one mixture of brine and dilute hydrochloric acid. The water layer was removed and the organic layer was dried over MgSO4. The solvents were removed in vacuo and the residual off-white powder was washed with methanol and crystallised from ethanol/THF. Yield: 0.85 g of white crystals (62%). Mp 214-216 °C. 1H NMR (CDCl3):  = 7.41 (d, 4*J*(H,H) = 2.0 Hz, 1H; CH), 7.33 (d, 4*J*(H,H) = 2.4 Hz, 1H; CH), 7.25 (m, 6H; CH), 7.14 (m, 8H; CH), 7.03 (d, 4*J*(H,H) = 2.4 Hz, 1H; CH), 6.88 (m, 6H; CH), 6.49 (dd, 2*J*(P,H) = 4.1 Hz, 4*J*(H,H) = 2.4 Hz, 1H; CH), 1.72 (s, 6H; CH3), 1.28 (s, 9H; *t*-Bu), 1.13 (s, 9H; *t*-Bu). 31P{1H} NMR (CDCl3):  = -15.7. 13C{1H} NMR (CDCl3):  = 149.8 (d, 2*J*(P,C) = 17.4 Hz; CO), 147.2, 145.8, 145.0, 144.9, 137.6 (d, 1*J*(P,C) = 15.1 Hz; PC), 133.6 (d, 2*J*(P,C) = 21.1 Hz; PCCH), 133.1, 130.7, 129.0 (CH), 128.6, 128.4 (CH), 127.9 (CH), 127.8 (CH), 125.6 (CH), 124.6 (d, 1*J*(P,C) = 19.6 Hz; PC), 122.8 (CH), 121.6 (CH), 120.8 (CH), 119.4 (CH), 34.7 (d, 4*J*(P,C) = 1.5 Hz; C9), 34.3 (C(CH3)3), 34.3 (C(CH3)3), 32.1 (C9CH3), 31.3 (C(CH3)3), 31.1 (C(CH3)3). IR (KBr, cm-1): 2965 (s), 1589 (s), 1494 (s), 1434 (s), 1327 (m), 1304 (m), 1271 (s), 1240 (s), 742 (s), 697 (s), 499 (m). Anal. Calcd. for C47H48NOP: C, 83.77; H, 7.18; N, 2.08. Found: C, 83.70; H, 7.22; N, 2.00.

**2,7-Di-*tert*-butyl-9,9-dimethyl-4,5-bis(10-phenoxarsino)xanthene (2c).** This compound was prepared similarly to **1c**. Compound **1c** was crystallised from THF. Yield: 0.80 g of white crystals (64%). Mp 315-316 °C. 1H NMR (CDCl3):  = 7.99 (dd, 3*J*(H,H) = 7.4 Hz, 4*J*(H,H) = 1.7 Hz, 4H; CH), 7.40 (dt, 3*J*(H,H) = 7.7 Hz, 4*J*(H,H) = 1.7 Hz, 4H; CH), 7.29 (dd, 3*J*(H,H) = 8.2 Hz, 4*J*(H,H) = 1.2 Hz, 4H; CH), 7.26 (d, 4*J*(H,H) = 2.4 Hz, 2H; H1,8), 7.15 (dt, 3*J*(H,H) = 7.3 Hz, 4*J*(H,H) = 1.3 Hz, 4H; CH), 6.75 (d, 4*J*(H,H) = 2.3 Hz, 2H; C3,6), 6.34 (bs, 4H; CH), 6.20 (t, 3*J*(H,H) = 7.7 Hz, 4H; CH), 6.59 (d, 3*J*(H,H) = 7.4 Hz, 4H; CH), 1.56 (s, 6H; CH3), 1.09 (s, 18H; *t*-butyl). 13C{1H} NMR (CDCl3):  = 155.2 (CO), 149.6 (CO), 145.4 (C2,7), 135.4 (CH), 130.3 (CH), 128.8 (C1,8/3,6), 128.7 (CC9), 127.3 (C4,5), 123.4 (CH), 120.1 (Cas), 118.0 (CH), 34.6 (C9), 34.2 (C(CH3)3), 32.5 (C9CH3), 31.0 (C(CH3)3). IR (KBr, cm-1): 2963 (s), 1581 (m), 1460 (m), 1424 (s), 1296 (m), 1261 (s), 1242 (m), 1223 (s), 882 (m), 757 (s). Anal. Calcd. for C47H44As2O3: C, 69.98; H, 5.50. Found: C, 69.68; H, 5.77.

**4-Bromo-2,7-di-*tert*-butyl-9,9-dimethyl-5-diphenylphosphinoxanthene (7).** At -15 °C 3.8 ml of *n*-butyllithium (2.5 M in hexanes, 9.5 mmol) was added dropwise to a stirred solution of 4.50 g of **4** (9.38 mmol) in 100 ml of THF. The resulting yellow solution was stirred for 1 h. Next a solution of 1.9 ml of chlorodiphenylphosphine (10 mmol) in 10 ml of hexanes was added and the reaction mixture was warmed to room temperature. After 1 h the reaction mixture was diluted with 50 ml of diethyl ether and hydrolysed with 50 ml of a one to one mixture of brine and dilute hydrochloric acid. The water layer was removed and the organic layer was dried over MgSO4. The solvents were removed in vacuo and the residual off-white powder was washed with hexanes and crystallised from dichloromethane/ethanol. Yield: 2.48 g of white crystals (45%). Mp 177-179 °C. 1H NMR (CDCl3):  = 7.35 (m, 13H; CH), 6.55 (dd, 4*J*(H,H) = 2.4 Hz, 3*J*(P,H) = 4.4 Hz, 1H; H6), 1.64 (s, 6H; CH3), 1.29 (s, 9H; *t*-butyl), 1.13 (s, 9H; *t*-butyl). 31P{1H} NMR (CDCl3):  = -13.2. 13C{1H} NMR (CDCl3):  = 149.7 (d, 2*J*(P,C) = 15.6 Hz; CO), 146.7, 145.9, 145.2, 136.8 (d, 1*J*(P,C) = 10.6 Hz; PC), 134.5 (CH), 134.2 (CH), 131.1, 129.1 (CH), 128.6 (d, 2*J*(P,C) = 29.4 Hz; PCCH), 128.5 (CH), 124.8 (d, 1*J*(P,C) = 15.1 Hz; PC), 123.2 (CH), 121.6 (CH), 35.4 (C9), 34.7 (C(CH3)3), 34.7 (C(CH3)3), 32.4 (C9CH3), 31.5 (C(CH3)3), 31.4 (C(CH3)3). IR (KBr, cm-1): 2963 (s), 2869 (m), 1478 (m), 1434 (s), 1363 (m), 1305 (m), 1271 (s), 1187 (m), 1109 (m), 867 (m), 742 (s), 695 (s), 496 (m). Anal. Calcd. for C35H38BrOP: C, 71.79; H, 6.55. Found: C, 71.58; H, 6.59.

**2,7-Di-*tert*-butyl-9,9-dimethyl-4-diphenylarsino-5-diphenylphosphinoxanthene (1e).** At -60 °C 1.1 ml of *n*-butyllithium (2.5 M in hexanes, 2.8 mmol) was added dropwise to a stirred solution of 1.50 g of **7** (2.56 mmol) in 25 ml of THF. The resulting beige suspension was stirred for 1 h. Next a solution of 0.75 g of cholorodiphenylarsine (2.8 mmol) in 7.5 ml of hexanes was added and the reaction mixture was slowly warmed to room temperature overnight. The reaction mixture was diluted with 25 ml of ethyl acetate and hydrolysed with 25 ml of a one to one mixture of brine and dilute hydrochloric acid. The water layer was removed and the organic layer was dried over MgSO4. The solvents were removed in vacuo and the residual off-white powder was washed with hexanes and crystallised from ethanol/THF. Yield: 0.93 g of white crystals (49%). Mp 201-203 °C. 1H NMR (CDCl3):  = 7.41 (d, 4*J*(H,H) = 2.3 Hz, 1H; CH), 7.37 (d, 4*J*(H,H) = 2.4 Hz, 1H; CH), 7.23 (m, 20H; CH), 6.67 (d, 4*J*(H,H) = 2.3 Hz, 1H; CH), 6.52 (dd, 3*J*(P,H) = 4.5 Hz, 4*J*(H,H) = 2.3 Hz, 1H; H6), 1.69 (s, 6H; CH3), 1.15 (s, 18H; *t*-Bu). 31P{1H} NMR (CDCl3):  = -15.6. 13C{1H} NMR (CDCl3):  = 149.7 (d, 2*J*(P,C) = 15.9 Hz; CO), 146.7, 145.9, 145.2, 136.7 (d, 1*J*(P,C) = 10.6 Hz; PC), 134.5 (CH), 134.2 (CH), 131.1, 129.1 (CH), 128.8 (d, 2*J*(P,C) = 29.3 Hz; PCCH), 128.6, 128.6 (CH), 124.7 (d, 1*J*(P,C) = 13.7 Hz; PC), 123.2 (CH), 121.6 (CH), 35.4 (C9), 34.7 (C(CH3)3), 34.7 (C(CH3)3), 32.4 (C9CH3), 31.4 (C(CH3)3), 31.4 (C(CH3)3). IR (KBr, cm-1): 2961 (s), 1477 (m), 1423 (s), 1264 (s), 1247 (s), 1186 (m), 740 (s), 695 (s), 499 (m). Anal. Calcd. for C47H48AsOP: C, 76.83; H, 6.58. Found: C, 76.56; H, 6.41.

**Rhx(CO)y(1d)n (8).** A solution of Rh(CO)2(acac) (2.6 mg, 10 mol) and **1d** (7.4 mg, 11 mol) in 1.0 ml of C6D6 was pressurised with 20 bar of CO/H2 (1:1) and stirred for two h. at 70 °C. The reaction mixture was cooled down to room temperature, depressurised and transferred into a 0.5 cm NMR tube and directly analysed at atmospheric pressure. 1H NMR (C6D6):  = 8.02 (bm, 4H; CH), 7.62 (d, 4*J*(H,H) = 2.1 Hz, 1H; CH), 7.43 (d, 4*J*(H,H) = 2.1 Hz, 1H; CH), 7.00 (m, 18H; CH), 1.71 (s, 6H; CH3), 1.17 (s, 9H; *t*-butyl), 1.06 (s, 9H; *t*-butyl). 31P{1H} NMR (C6D6): (bd, 1*J*(Rh,P) = 184 Hz). HP-IR (cyclohexane, carbonyl region, cm-1): 2074 (vs), 2062 (w), 2043 (m), 2028 (m), 2022 (s), 2006 (m), 1869 (w), 1855 (w), 1820 (s).

**(1c)Rh(CO)2H (9).** This complex was prepared similarly to **8**. 1H NMR (C6D6):  = 7.70 (bs, 4H; CH), 7.51 (d, 4*J*(H,H) = unresolved, 2H; CH), 7.39 (m, 4H; CH), 6.99 (m, 2H; CH), 6.87 (bd, 3*J*(H,H) = 5.7 Hz, 8H;CH), 6.75 (bs, 4H; CH), 1.61 (bs, 6H; CH3), 1.05 (s, 18H; *t*-butyl), -9.68 (d, 1*J*(Rh,H) = 11.1 Hz, 1H; RhH). HP-IR (cyclohexane, carbonyl region, cm-1): 2036 (w), 1998 (m), 1971 (w), 1953 (s).

**(1e)Rh(CO)2H (10).** This complex was prepared similarly to **8**. 1H NMR (C6D6):  = 7.50 (bm, 9H; CH), 6.81 (bm, 15H; CH), 1.57 (s, 6H; CH3), 1.05 (s, 9H; *t*-butyl), 1.02 (s, 9H; *t*-butyl), -8.65 (dd, 1*J*(Rh,H) = 8.4 Hz, 2*J*(P,H) = 78.0 Hz, 1H; RhH). 31P{1H} NMR (C6D6): (bd, 1*J*(Rh,P) = 112 Hz). HP-IR (cyclohexane, carbonyl region, cm-1): 2037 (s), 1998 (s), 1978 (s), 1953 (vs), 1767 (w), 1754 (s).

**(1d)Pt(SnCl3)Cl (12a).** This complex was prepared similarly to **11a**. 1H NMR (25 ºC, CD2Cl2):  = 7.40 (bm, 8H; CH), 6.88 (bm, 12H; CH), 6.48 (bs, 2H; CH), 6.27 (bs, 2H; CH), 1.71 (bs, 6H; CH3), 1.02 (m, 18H; *t*-butyl). 31P{1H} NMR (25 ºC, CD2Cl2): (1*J*avg(Pt,P) = 3641 Hz (satellites), 2*J*avg(Sn,P) = 184 Hz (satellites)). 31P{1H} NMR (-73 ºC, CD2Cl2): (1*J*(Pt,P) = 3081 Hz (satellites); PtransSn), 7.6 (1*J*(Pt,P) = unresolved), -0.5 (1*J*(Pt,P) = 3601 Hz (satellites); PtransCl),.

**(1e)Pt(SnCl3)Cl (13a).** This complex was prepared similarly to **11a**. 1H NMR (25 ºC, CD2Cl2):  = 7.30 (bm, 21H; CH), 6.70 (bm, 3H; CH), 1.73 (bs, 6H; CH3), 1.29 (s, 6H; *t*-butyl), 1.22 (s, 12H; *t*-butyl). 31P{1H} NMR (25 ºC, CD2Cl2): (1*J*avg(Pt,P) = 3750 Hz, satellites). 31P{1H} NMR (-73 ºC, CD2Cl2): (1*J*(Pt,P) = 3697 Hz (satellites), 2*J*avg(Sn,P) = 212 Hz (satellites), PtransCl), -2.6 (1*J*(Pt,P) = 2660 Hz (satellites), PtransSn).

**(3)Pt(SnCl3)Cl (14a).** This complex was prepared similarly to **11a**. 1H NMR (25 ºC, CD2Cl2):  = 7.69 (bm, 6H; CH), 7.27 (bm, 14H; CH), 6.77 (m, 4H; CH), 6.40 (bs, 1H; CH), 6.11 (bs, 1H; CH), 2.94 (bs, 4H; CH2). 31P{1H} NMR (25 ºC, CD2Cl2): (d, 1*J*avg(Pt,P) = 3904 Hz (satellites), 2*J*(P,P) = 14.6 Hz). 31P{1H} NMR (-50 ºC, CD2Cl2): (d, 1*J*(Pt,P) = 3117 Hz (satellites), 2*J*(P,P) = 13.0 Hz, PtransSn), 7.8 (d, 1*J*(Pt,P) = 3840 Hz (satellites), 2*J*(P,P) = 13.0 Hz, PtransCl).

**(3)Pt(CO)(SnCl3)Cl (14b).** HP-IR (CH2Cl2, carbonyl region, cm-1): 2041 (PtCO).
